# Supplementary material for: A comparison study to assess U-Net driven volumetric versus single-slice analysis and MRI sequences with different volume coverage to detect renal sinus fat in people with and without diabetes
Source: Research Square preprint supplement (doi:10.21203/rs.3.rs-7904427/v1), 2025-11-14
Supplement: Supplementary file 1 [file 659ac21992b0874576551277.docx]

# Supplementary Information Documents

## Analysis of RSF and RP between left and right kidney

Anatomical differences between left and right kidney were evaluated on dual-echo GRE images displaying full-kidney coverage (n=187). As compared to the right kidney, the compartments of the left kidney were larger across all the groups, with values up to 7% and 36% in average higher in the RP and RSF compartments, respectively, (Supplemental Information Fig. 2a-c and Table 2).

# Supplementary Information Figures


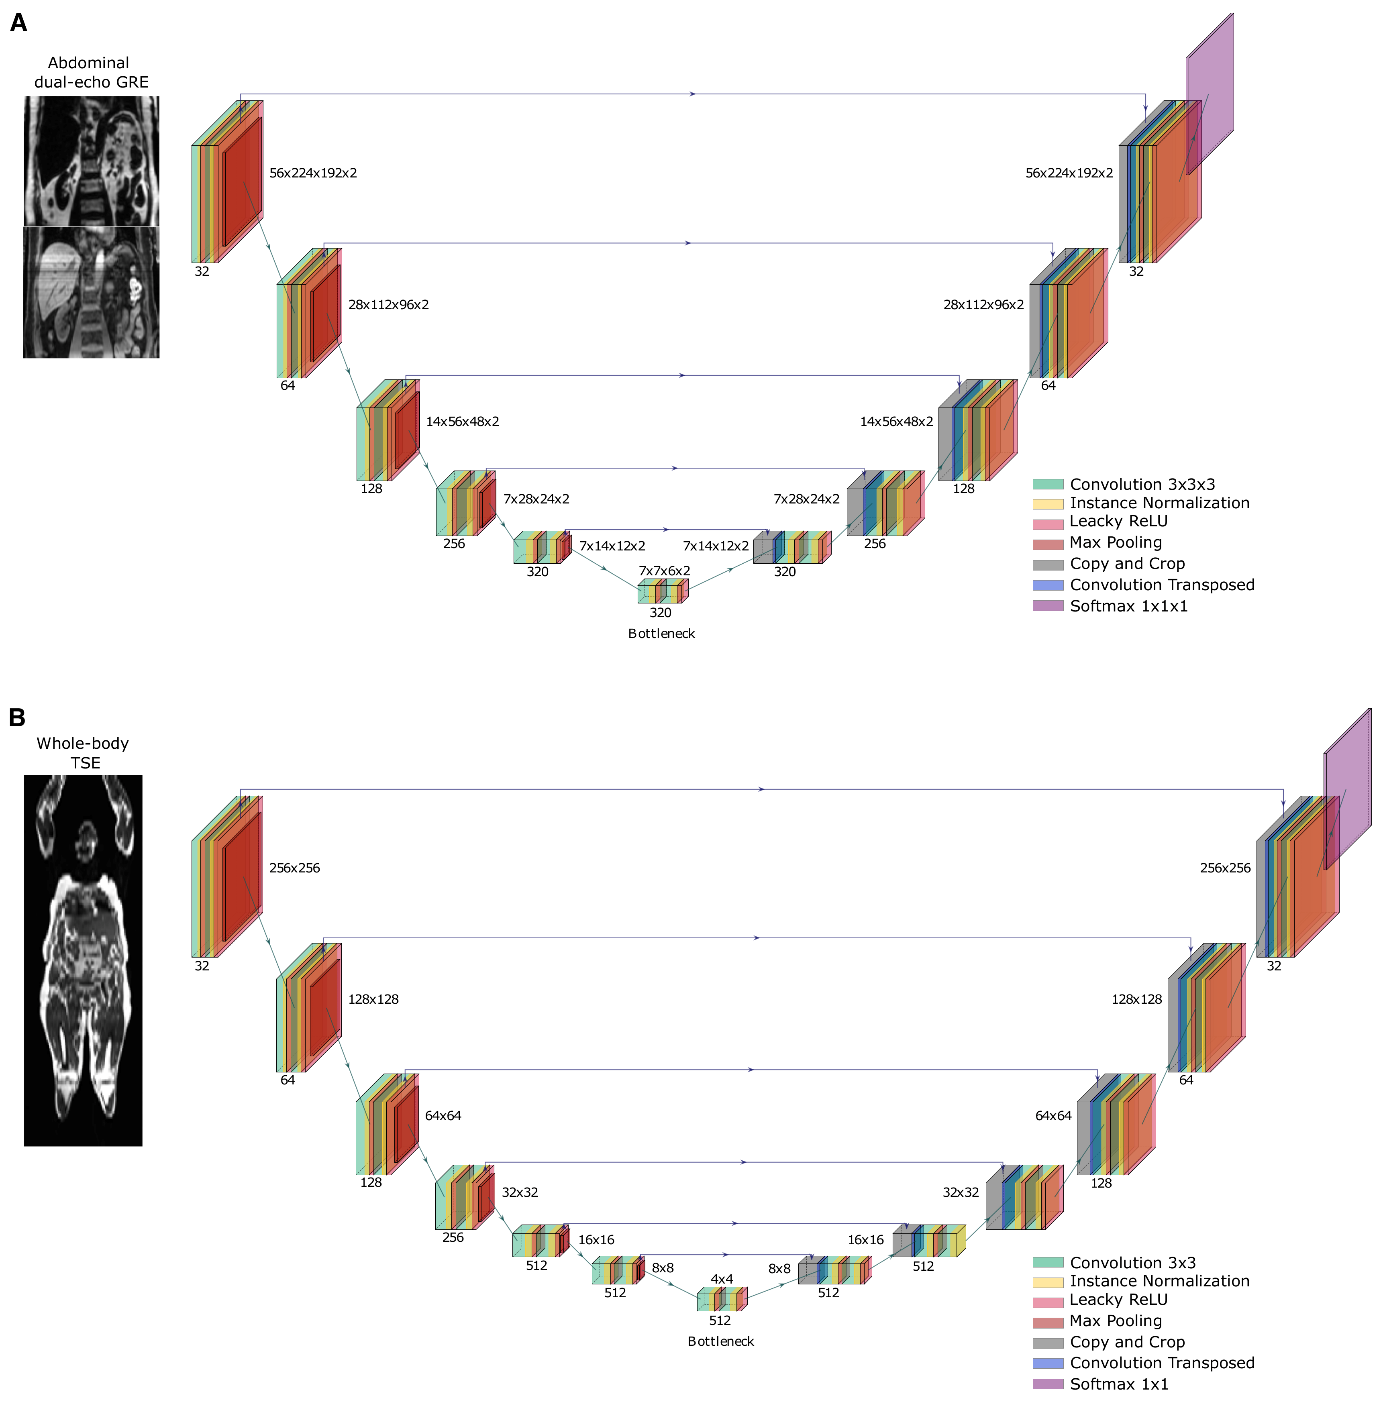


Fig. 1: U-Net architectures for abdominal GRE and whole-body TSE images

Display of the coronal view of the (**A**) abdominal dual-echo gradient echo (GRE) and (**B**) whole-body turbo spin-echo (TSE) MRI protocols and their respective 3D- and 2D U-shaped convolutional neural networks, which were optimized using a nnU-Net framework. ​The networks consist of a decoder-encoder structure with skip connections to preserve spatial information. For each level, two sequential blocks of convolution-instance normalization-activation layers were applied following max-pooling. A softmax multi-class function is used to reduce the number of feature maps to the number of output classes.


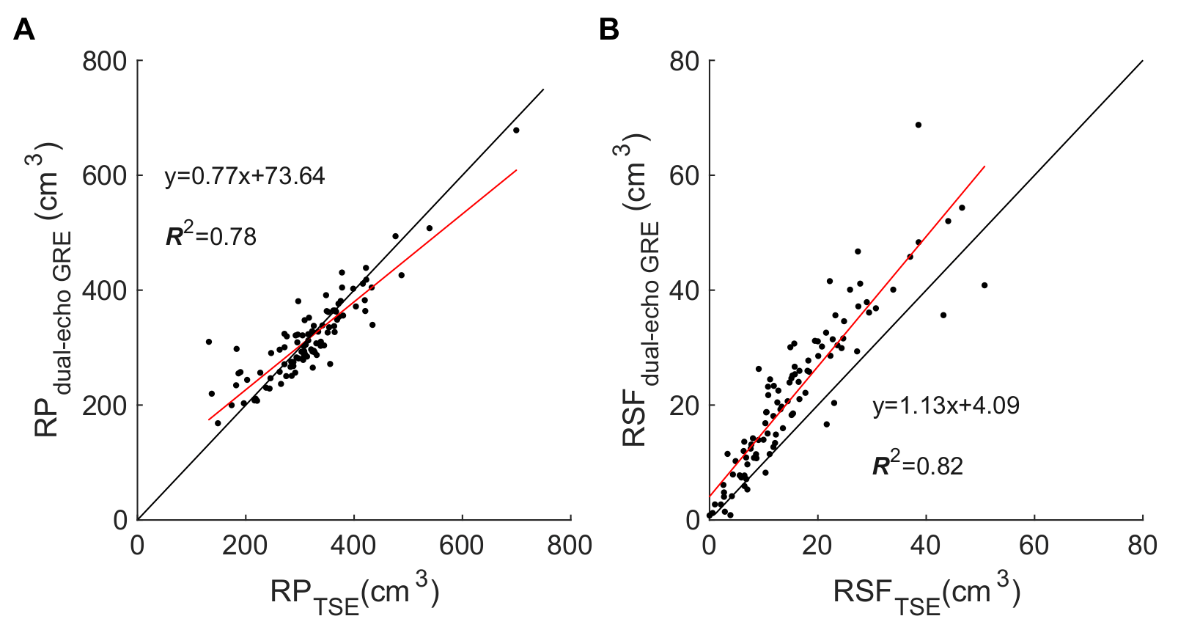


Fig. 2: Comparison of renal parenchyma and renal sinus fat between high-resolution abdominal GRE and whole-body TSE images with interslice-gaps

The scatter plots display the estimates of (**A**) renal parenchyma (RP) (cm3) and (**B**) renal sinus fat (RSF) (cm3) calculated from the dual-echo gradient-echo (GRE) images against the respective values from the same person obtained from the analysis of turbo-spin echo (TSE) images acquired with interslice-gaps. Linear regression (red line) and identity lines (back line) as well as the coefficients of determination (*R*2) are displayed.


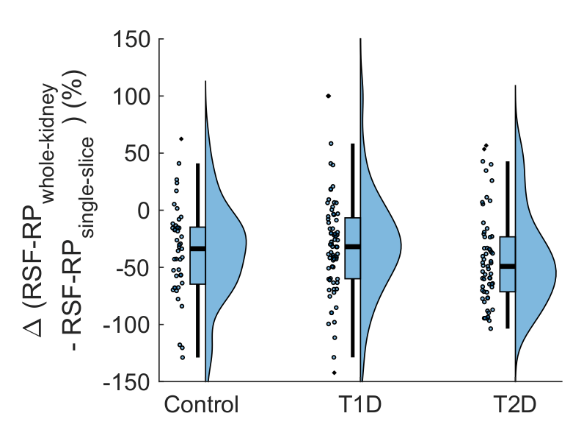


Fig. 3: Comparison between whole-kidney and single-slice approach for RSF-RP ratio analysis

The half-violin plots and the corresponding scatter and boxplots display the percentage difference between the renal sinus fat-to-renal parenchyma (RSF-RP) ratio calculated using a whole-kidney and single-slice approach. Median percentage differences are displayed (black lines).


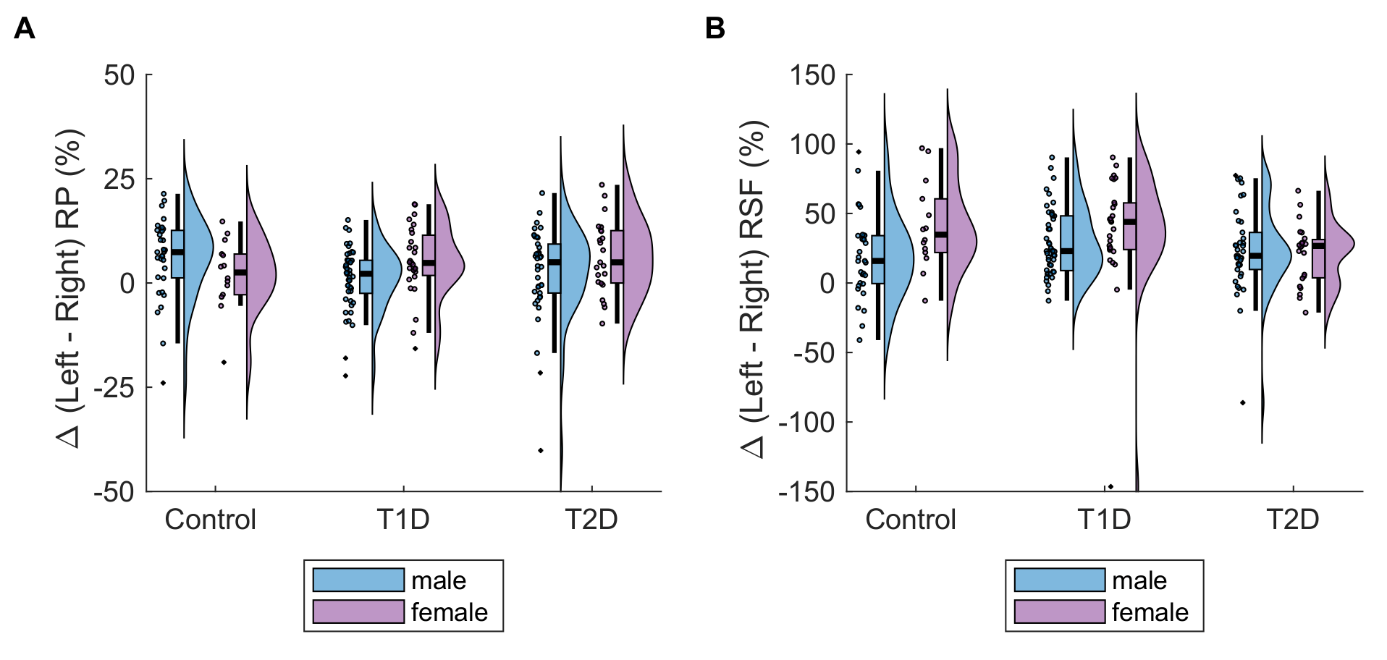


Fig. 4 Comparison of left and right kidney structures across gender and glycaemic status

The half-violin plots and the corresponding scatter and boxplots display the percentage difference between the volume of the left and the right kidney for (**A**) the renal parenchyma (RP) and (**B**) renal sinus fat (RSF).

# Supplementary Information Tables

Table 1: Summary of the Parameters used for Abdominal Dual-echo GRE and Whole-body MR Image Acquisition

|  | General MRI parameters | |
| --- | --- | --- |
|  | **abdominal**  **dual-echo GRE** | **whole-body**  **TSE** |
| TR/TE(s) (ms) | 3.76/1.32, 2.40 | 400/38 |
| FA (°) | 10 | 90 |
| Slice thickness (mm) | 2 | 10 |
| Interslice-gap (mm) | - | 10 |
| FoV (mm) | 375×306×250 |  |
| Matrix size | 252×170×125 | 256×256 |
| BW (Hz) | 1240 | 787 |
| ETL | - | 7 |
| SENSE factor | 2 | - |
| *BW: Bandwidth*  *ETL: Echo Train Length*  *GRE: Gradient-Echo*  *FA: Flip Angle*  *FoV: Field of View*  *TE: Time of Echo*  *TR: Time of Repetition*  *TSE: Turbo-Spin Echo*  *SENSE: Sensitivity Encoding* | | |

Table 2: Left and Right Kidney Quantification from Whole-kidney Analysis of Dual-echo GRE Images

|  | *Male* | | | | | |
| --- | --- | --- | --- | --- | --- | --- |
|  | **Control**  **(n=31)** | | **T1D**  **(n=45)** | | **T2D**  **(n=38)** | |
|  | **RP** | **RSF** | **RP** | **RSF** | **RP** | **RSF** |
| Left kidney (cm3) | 160.1  ±36.3 | 15.7  ±8.4 | 168.5  ±35.8 | 12.7  ±6.3 | 174.9  ±36.2 | 13.7  ±8.0 |
| Right kidney (cm3) | 149.6  ±31.2 | 13.4  ±8.2 | 166.5  ±37.4 | 9.9  ±6.5 | 170.3  ±36.8 | 11.0  ±8.0 |
| Δ (%) | 5.8  ±9.8 | 19.1  ±30.1 | 1.1  ±7.6 | 29.1  ±24.3 | 2.4  ±11.3 | 23.2  ±30.6 |
|  | ***Female*** | | | | | |
|  | **Control**  **(n=14)** | | **T1D**  **(n=27)** | | **T2D**  **(n=23)** | |
|  | **RP** | **RSF** | **RP** | **RSF** | **RP** | **RSF** |
| Left kidney (cm3) | 152.6  ±36.1 | 11.7  ±7.1 | 151.3  ±41.4 | 9.9  ±6.6 | 143.8  ±25.1 | 12.7  ±8.5 |
| Right kidney (cm3) | 149.3  ±36.2 | 8.0  ±7.0 | 142.3  ±36.2 | 6.3  ±5.2 | 134.7  ±25.8 | 10.6  ±8.1 |
| Δ (%) | 2.1  ±8.5 | 40.8  ±31.6 | 5.2  ±8.5 | 36.9  ±44.0 | 6.3  ±8.7 | 20.9  ±21.9 |
| *Note: values are reported as mean±standard deviation (SD)*  *RP: Renal Parenchyma*  *RSF: Renal Sinus Fat*  *T1D: Type 1 Diabetes*  *T2D: Type 2 Diabetes* | | | | | | |
